# Supplementary material for: Genes Implicated in Familial Parkinson’s Disease Provide a Dual Picture of Nigral Dopaminergic Neurodegeneration with Mitochondria Taking Center Stage
Source: MDPI journal article supplement (doi:10.3390/ijms22094643), 2021-04-28
Supplement: s1 [file s1]

**Supplementary Material:** The following are available online at [www.mdpi.com/xxx/s1](http://www.mdpi.com/xxx/s1).

## **Genes implicated in familial Parkinson's disease provide a dual picture of nigral dopaminergic neurodegeneration, with mitochondria taking center stage**

**Rafael Franco<sup>†1,2</sup>, Rafael Rivas-Santisteban<sup>†1,2</sup>, Gemma Navarro<sup>†2,3</sup>, Annalisa Pinna<sup>\*†4</sup> and Irene Reyes-Resina<sup>††</sup>**

<sup>1</sup> Dept. Biochemistry and Molecular Biomedicine. University of Barcelona, 08028 Barcelona, Spain; [rfranco@ub.edu](mailto:rfranco@ub.edu) (RF); [rrivasbioq@gmail.com](mailto:rrivasbioq@gmail.com) (RR-S); [ire-reyes@hotmail.com](mailto:ire-reyes@hotmail.com) (IR-R)

<sup>2</sup> Centro de investigación Biomédica en Red Enfermedades Neurodegenerativas (CiberNed), Instituto de Salud Carlos III, 28031 Madrid, Spain

<sup>3</sup> Dept. Biochemistry and Physiology. School of Pharmacy and Food Sciences. University of Barcelona, 08028 Barcelona, Spain; [g.navarro@ub.edu](mailto:g.navarro@ub.edu) (GN)

<sup>4</sup> National Research Council of Italy (CNR), Neuroscience Institute – Cagliari; Cittadella Universitaria, 09042 Monserrato (CA), Italy. [apinna@unica.it](mailto:apinna@unica.it) (AP)

**† Current address:** RG Neuroplasticity, Leibniz Institute for Neurobiology, Brennekestr. 6, 39118 Magdeburg, Germany

**‡ These authors contributed equally to this work.**

**\* Corresponding author**

**Annalisa Pinna:** National Research Council of Italy (CNR), Neuroscience Institute – Cagliari; Cittadella Universitaria, Blocco A, SP 8, Km 0.700, 09042 Monserrato (Cagliari), Italy. [apinna@unica.it](mailto:apinna@unica.it) (AP); [annalisa.pinna@in.cnr.it](mailto:annalisa.pinna@in.cnr.it) (AP)

## Supplementary Figure S1 and Table S1

### Supplementary Figure S1.

STRING analysis of connections of either SNCA (A), GBA (B), FBXO7 (C), ATP13A2 (D) and UCHL1 (E).

Line color code. Sky blue: known interactions from curated databases; magenta: experimentally determined interactions; green: predicted from neighborhood; red: predicted from gene fusions; blue: predicted from gene co-occurrence; pastel green: textmining; black: coexpression and clear violet: protein homology.

Panel A: SNCA

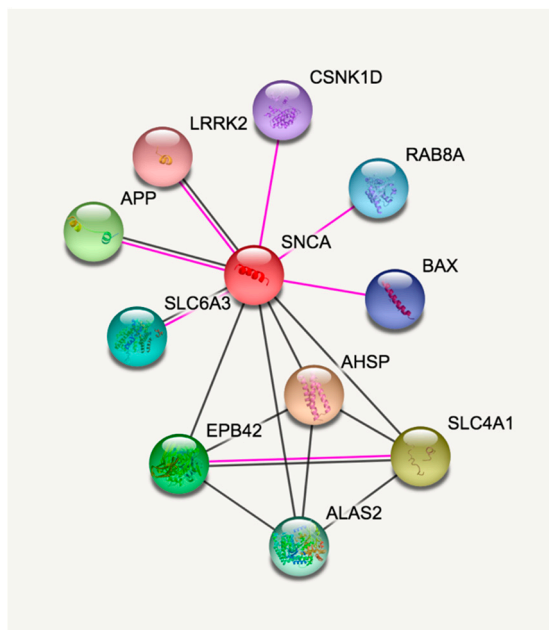

Panel C: FBXO7

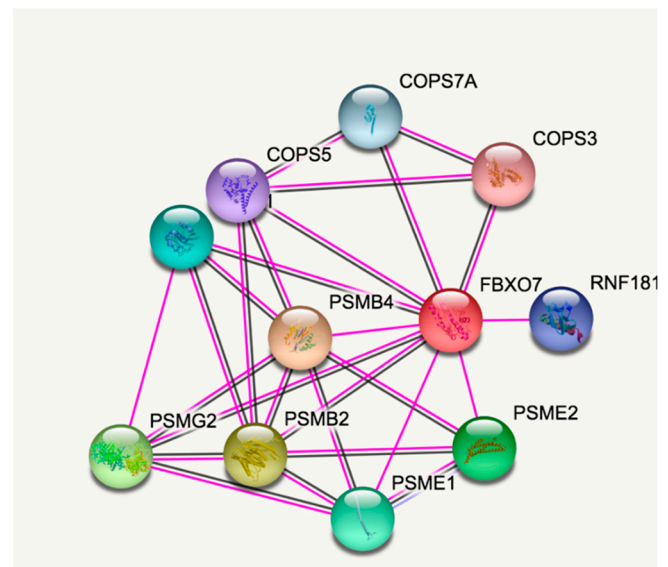

Panel B: GBA

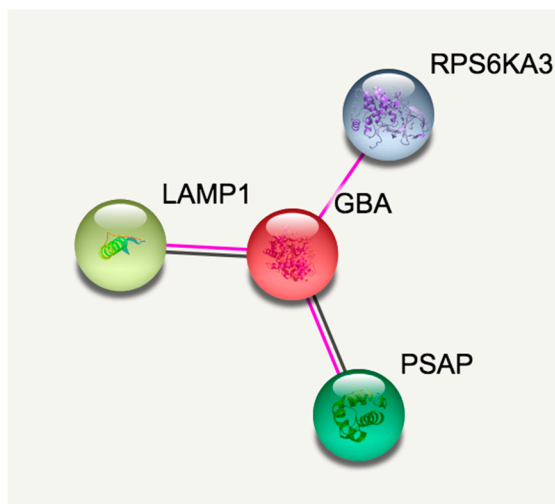

Panel D: ATP13A2

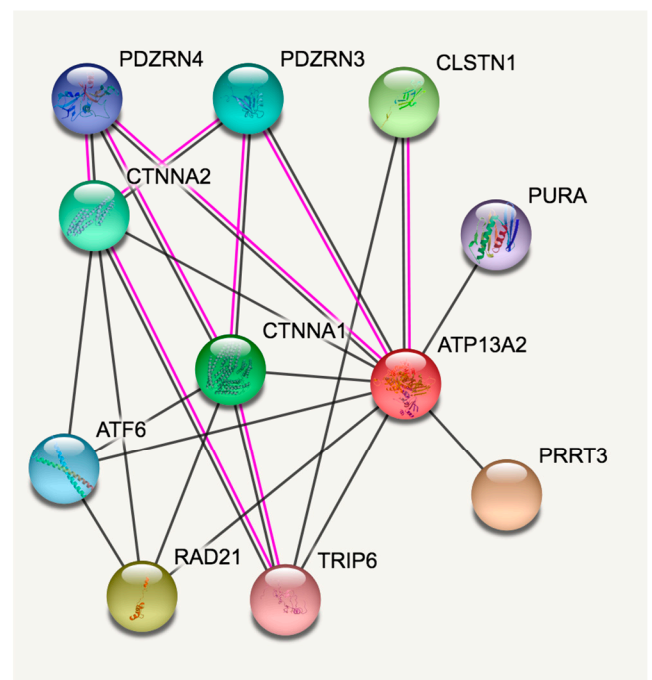

Panel E: UCHL1

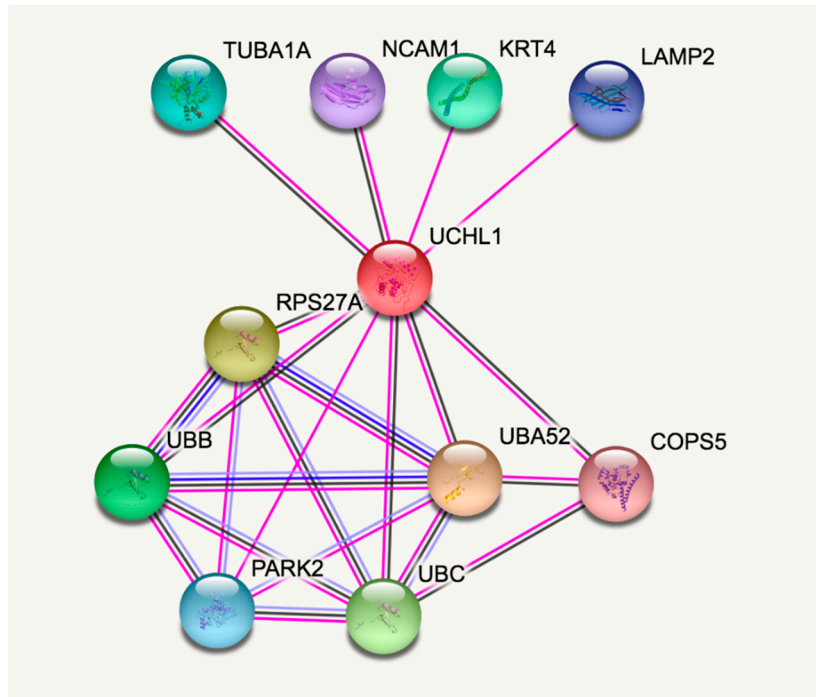

Table S1. Findings in animal models related to *Gba*, *Uchl1*, *Vps35*, *Atp13a2*, *Pla2g6*, *Dnajc6*, *Synj1*, *DJ-1/Park7* and *Fbxo7*

| Gene                         | Animal model(s)                                                                                                                           | In<br>vi<br>vo | In<br>vit<br>ro | Expression level                                 | Main findings                                                                   | Reference |
|------------------------------|-------------------------------------------------------------------------------------------------------------------------------------------|----------------|-----------------|--------------------------------------------------|---------------------------------------------------------------------------------|-----------|
| GBA                          | K-14Cre-positive <i>Gba<sup>lnl/lnl</sup></i>                                                                                             |                | X               | <i>Gba</i> KO mice (except in skin)              | • Strong similarities with Gaucher disease pathology                            | [1]       |
|                              | B6;129S6- <i>Gba<sup>tm1Nsb</sup>/J</i>                                                                                                   |                | X               | <i>Gba</i> KO mice                               | • Downregulation of neurotrophic factors                                        | [2]       |
|                              | n.s.n.                                                                                                                                    |                | X               | <i>Gba</i> KO mice                               | • Autophagic lysosome reformation dysfunction                                   | [3]       |
|                              | Mice resulting from crossing SNCA Tg/Tg line with <i>Gba</i> +/- line (n.s.n.)                                                            |                | X               | SNCA overexpressing <i>Gba</i> KO mice           | • Increased total $\alpha$ -syn accumulation<br>• Altered lipid metabolism      | [4]       |
|                              | Mice resulting from crossing A53T $\alpha$ -synuclein transgenic line M83 with <i>Gba</i> KO line B6;129S6- <i>Gba<sup>tm1Nsb</sup>/J</i> | X              | X               | A53T-SNCA overexpressing <i>Gba</i> KO mice      | • Impact on PD disease onset                                                    | [5]       |
|                              | B6;129S4- <i>Gbatm1Rlp/Mmnc</i>                                                                                                           | X              | X               | L444P- <i>Gba</i> KI mice                        | • Increased total $\alpha$ -syn accumulation<br>• Enhanced neuron vulnerability | [6]       |
|                              | B6;129P2- <i>Uchl1<sup>tm1Dgen</sup>/Mmnc</i>                                                                                             | X              | X               | <i>UCH-L1</i> KO mice                            | • Significantly decreased motor performance on the rotarod test                 | [7]       |
| <i>UCHL1</i> <sup>&gt;</sup> | Mice resulting from crossing B6;129P2- <i>Uchl1<sup>tm1Dgen</sup>/Mmnc</i> line with Thy1-maSN line                                       | X              | X               | <i>Snc</i> a overexpressing <i>Uchl1</i> KO mice | • Earlier-onset motor deficits                                                  | [8]       |
|                              | B6.Cg- <i>Vps35<sup>tm1.2Mjff</sup>/J</i>                                                                                                 | X              | X               | D620N- <i>Vps35</i> KI mice                      | • Manifest tau neuropathology and dopaminergic neurodegeneration                | [9]       |

|         |                                                                                                                           |   |   |                                                                                |                                                                                                                                                                                                                    |      |
|---------|---------------------------------------------------------------------------------------------------------------------------|---|---|--------------------------------------------------------------------------------|--------------------------------------------------------------------------------------------------------------------------------------------------------------------------------------------------------------------|------|
|         | 129S- <i>Prkn</i> <sup>tm1Rpa</sup> /J                                                                                    | X |   | <i>Prkn</i> KO mice                                                            | <ul style="list-style-type: none"> <li>Insensibility to 6-OHDA and methamphetamine neurotoxicity</li> </ul>                                                                                                        | [10] |
| VPS35   | 129S- <i>Prkn</i> <sup>tm1Rpa</sup> /J                                                                                    | X |   | <i>Prkn</i> KO mice                                                            | <ul style="list-style-type: none"> <li>Do not exhibit robust signs of parkinsonism</li> </ul>                                                                                                                      | [11] |
| ATP13A2 | Mice resulting from crossing B6N.129S6(Cg)- <i>Atp13a2</i> <sup>tm1Pjsh</sup> /J line with B6;DBA-Tg(Thy1-SNCA)61Ema line | X |   | <i>Atp13a2</i> KO mice overexpressing human SNCA                               | <ul style="list-style-type: none"> <li>Impaired sensorimotor function</li> </ul>                                                                                                                                   | [12] |
|         | B6;129S6- <i>Pla2g6</i> <sup>tm1Zyao</sup> /J                                                                             | X | X | <i>Pla2g6</i> KO mice                                                          | <ul style="list-style-type: none"> <li>No evidence that leads to dyslipidemia</li> <li>Altered catabolism of TAG-rich lipoproteins</li> </ul>                                                                      | [13] |
|         | <i>iPLA2-VIA</i> -deficient flies (n.s.n.)                                                                                | X | X | <i>iPLA2-VIA</i> KO Drosophila                                                 | <ul style="list-style-type: none"> <li>Dysregulation in neuronal functions and <math>\alpha</math>-syn</li> </ul>                                                                                                  | [14] |
|         | y w;; <i>iPLA2-VIA</i> $\Delta$ 174 y w;; <i>iPLA2-VIA</i> $\Delta$ 192                                                   | X | X | <i>iPLA2-VIA</i> KO Drosophila                                                 | <ol style="list-style-type: none"> <li>1. stability</li> <li>2. Impaired retromer and lysosomal function in neurons</li> </ol>                                                                                     | [15] |
| PLA2G6  | PLA2G6 <sup>D331Y/D331Y</sup>                                                                                             | X | X | D331Y- <i>Pla2g6</i> KI mice                                                   | <ul style="list-style-type: none"> <li>Mitophagy impairment</li> <li>Mitochondrial dysfunction</li> <li>ER stress</li> </ul>                                                                                       | [16] |
|         | B6.129- <i>Dnajc6</i> <sup>tm1Legr</sup> /Mmjax                                                                           |   | X | <i>Dnajc6</i> KO mice                                                          | <ul style="list-style-type: none"> <li>Endocytosis and clathrin-uncoating defects</li> </ul>                                                                                                                       | [17] |
|         | C57BL/6- <i>Dnajc6</i> <sup>em1Mcook</sup> /J                                                                             | X | X | R857G- <i>Dnajc6</i> KI mice                                                   | <ul style="list-style-type: none"> <li>Impaired clathrin-mediated trafficking at the Golgi and at the synapse</li> </ul>                                                                                           | [18] |
|         | UAS-aux <sup>R16182</sup> (aux RNAi, VDRC)<br>UAS-aux <sup>R103426</sup> (aux RNAi, VDRC)                                 | X | X | Reduced aux expression Drosophila                                              | <ul style="list-style-type: none"> <li>Reduced locomotion and longevity</li> <li>DA neuron loss at the PPM1/2 cluster</li> <li>Enhanced and accelerated <math>\alpha</math>-syn-mediated DA neuron loss</li> </ul> | [19] |
| DNAJC6  | B6;129- <i>Synj1</i> <sup>tm1Pdc</sup> /J                                                                                 |   | X | <i>Synj1</i> KO mice                                                           | <ol style="list-style-type: none"> <li>7. Synaptic vesicles still form from synaptic endosomes</li> </ol>                                                                                                          | [20] |
|         | B6;129- <i>Synj1</i> <sup>tm1Pdc</sup> /J                                                                                 |   | X | <i>Synj1</i> KO mice                                                           | <ol style="list-style-type: none"> <li>8. Defects in both endocytosis and post-endocytic vesicle</li> </ol>                                                                                                        | [21] |
|         | B6;129- <i>Synj1</i> <sup>tm1Pdc</sup> /J                                                                                 |   | X | <i>Synj1</i> KO mice                                                           | <ul style="list-style-type: none"> <li>Exhibit neurological defects</li> </ul>                                                                                                                                     | [22] |
| SYNJ1   | B6;129- <i>Synj1</i> <sup>tm1Pdc</sup> /J                                                                                 |   | X | <i>Synj1</i> KO mice                                                           | <ol style="list-style-type: none"> <li>9. Die shortly after birth.</li> <li>10. Larger excitatory postsynaptic amplitudes</li> </ol>                                                                               | [23] |
|         | Mice resulting from crossing B6;129- <i>Synj1</i> <sup>tm1Pdc</sup> /J line with AD model line Tg2576                     | X | X | <i>Synj1</i> KO + AD model mice                                                | <ol style="list-style-type: none"> <li>11. Ameliorated AD-associated behavioral and synaptic deficits</li> </ol>                                                                                                   | [24] |
|         | Mice resulting from crossing B6;129- <i>Synj1</i> <sup>tm1Pdc</sup> /J line and B6.Cg-Tg(Lrrk2*G2019S)2Yue/J line         | X | X | G2019S- <i>Lrrk2</i> overexpressing <i>Synj1</i> KO mice                       | <ul style="list-style-type: none"> <li>Impaired sustained exocytosis in MB neurons</li> <li>Altered specific motor functions</li> </ul>                                                                            | [25] |
|         | n.s.n.                                                                                                                    |   | X | Overexpressing <i>Synj1</i> mice                                               | <ol style="list-style-type: none"> <li>12. Altered specific motor functions</li> <li>13. Enlarged endosomes</li> </ol>                                                                                             | [26] |
|         | n.s.n.                                                                                                                    | X | X | Down 's syndrome mouse model overexpressing either <i>Synj1</i> or human SYNJ1 | <ul style="list-style-type: none"> <li>Altered behavior</li> <li>Brain dysfunction</li> </ul>                                                                                                                      | [27] |
|         | SJ1 RQ-KI                                                                                                                 | X | X | R259Q- <i>Synj1</i> KI mice                                                    | <ul style="list-style-type: none"> <li>Endocytic defects</li> <li>Elevated auxilin and parkin</li> </ul>                                                                                                           | [28] |
|         | B6.129- <i>Park7</i> <sup>tm1Mak</sup>                                                                                    | X | X | <i>Dj-1</i> KO mice                                                            | <ol style="list-style-type: none"> <li>14. Brain dysfunction</li> <li>15. Elevated auxilin and parkin</li> <li>16. Impaired running wheel and rotarod performance</li> </ol>                                       | [29] |
|         | B6.129P2- <i>Park7</i> <sup>tm1Dsp</sup> /Cnbc                                                                            | X | X | <i>Dj-1</i> KO mice                                                            | <ul style="list-style-type: none"> <li>Mitochondrial defects and more ROS production</li> <li>Altered autophagy</li> </ul>                                                                                         | [30] |
|         | B6.129P2- <i>Park7</i> <sup>tm1Dsp</sup> /Cnbc                                                                            | X | X | <i>Dj-1</i> KO mice                                                            | <ol style="list-style-type: none"> <li>17. Altered autophagy</li> <li>18. Increased sensitivity to excitotoxicity and ischemia</li> </ol>                                                                          | [31] |
|         | B6.129P2- <i>Park7</i> <sup>tm1Dsp</sup> /Cnbc                                                                            | X | X | <i>Dj-1</i> KO mice                                                            | <ul style="list-style-type: none"> <li>DJ-1 is crucial for full</li> </ul>                                                                                                                                         | [32] |

|            |                                                                                                                                                                       |   |   |                                                                             |                                                                                                                                                                                            |         |
|------------|-----------------------------------------------------------------------------------------------------------------------------------------------------------------------|---|---|-----------------------------------------------------------------------------|--------------------------------------------------------------------------------------------------------------------------------------------------------------------------------------------|---------|
| DJ-1/PARK7 |                                                                                                                                                                       |   |   |                                                                             | 19. activation of AKT upon oxidative injury                                                                                                                                                |         |
|            | B6.Cg- <i>Park7<sup>tm1Shn</sup>/J</i>                                                                                                                                |   | X | <i>Dj-1</i> KO mice                                                         | 20. Lower expression of UCP4                                                                                                                                                               | [33]    |
|            | B6.Cg- <i>Park7<sup>tm1Shn</sup>/J</i>                                                                                                                                |   | X | <i>Dj-1</i> KO mice                                                         | 21. Loss of SNc dopaminergic neurons.                                                                                                                                                      | [34]    |
|            | B6.Cg- <i>Park7<sup>tm1Shn</sup>/J</i>                                                                                                                                | X | X | <i>Dj-1</i> KO mice                                                         | 22. Mitochondrial oxidative stress                                                                                                                                                         | [35]    |
|            | B6.Cg- <i>Park7<sup>tm1Shn</sup>/J</i>                                                                                                                                |   | X | <i>Dj-1</i> KO mice                                                         | <ul style="list-style-type: none"> <li>Increased mitochondrial Trx activity</li> <li>Increased GSH and GSSG levels</li> <li>Increased mitochondrial glutaredoxin (GRX) activity</li> </ul> | [36]    |
|            | B6.Cg- <i>Park7<sup>tm1Shn</sup>/J</i>                                                                                                                                |   | X | <i>Dj-1</i> KO mice                                                         | <ul style="list-style-type: none"> <li>Declined dendritic complexity</li> </ul>                                                                                                            | [37]    |
|            | B6.Cg- <i>Park7<sup>tm1Shn</sup>/J</i>                                                                                                                                |   | X | <i>Dj-1</i> KO mice                                                         | <ul style="list-style-type: none"> <li>Mitochondrial respiration not affected</li> </ul>                                                                                                   | [38]    |
|            | B6.Cg- <i>Park7<sup>tm1Shn</sup>/J</i>                                                                                                                                |   | X | <i>Dj-1</i> KO mice                                                         | <ul style="list-style-type: none"> <li>Altered Ca<sup>2+</sup> homeostasis in the skeletal muscle</li> </ul>                                                                               | [39]    |
|            | B6.Cg- <i>Park7<sup>tm1Shn</sup>/J</i>                                                                                                                                | X | X | <i>Dj-1</i> KO mice                                                         | <ul style="list-style-type: none"> <li>Absence of dopaminergic neuronal degeneration</li> </ul>                                                                                            | [40]    |
|            | B6.Cg- <i>Park7<sup>tm1Shn</sup>/J</i>                                                                                                                                | X | X | <i>Dj-1</i> KO mice                                                         | <ul style="list-style-type: none"> <li>Absence of LTD in medium spiny neurons</li> </ul>                                                                                                   | [41,42] |
|            | B6.Cg- <i>Park7<sup>tm1Shn</sup>/J</i>                                                                                                                                | X | X | <i>DJ-1</i> KO mice                                                         | <ul style="list-style-type: none"> <li>Enhanced sensitivity to energy metabolism impairment</li> </ul>                                                                                     | [43]    |
|            | B6;129X1- <i>Park7<sup>tm1Cai</sup>/Mmjax</i>                                                                                                                         | X | X | <i>Dj-1</i> KO mice                                                         | <ul style="list-style-type: none"> <li>Retinal abnormalities</li> <li>Visual dysfunction</li> </ul>                                                                                        | [44]    |
|            | B6;129X1- <i>Park7<sup>tm1Cai</sup>/Mmjax</i>                                                                                                                         | X | X | <i>Dj-1</i> KO mice                                                         | 30. Increased oxidative stress in mice                                                                                                                                                     | [45]    |
|            | DAT-Ret; <i>Dj-1</i> mice resulting from crossing B6.Cg- <i>Park7<sup>tm1Shn</sup>/J</i> line with DAT-Ret line                                                       | X | X | <i>Dj-1</i> KO + midbrain dopaminergic neurons <i>Ret</i> KO mice           | <ul style="list-style-type: none"> <li>Interaction between DJ-1 and Ret-mediated signaling</li> <li>DJ-1 promotes cell survival</li> </ul>                                                 | [46]    |
|            | B6.129- <i>Park7<sup>tm1Mak</sup></i><br>FVB/N- <i>Khdrbs2<sup>Tg(LRRK2* R1441G)135Cjli</sup>/J</i>                                                                   | X | X | - <i>Dj-1</i> KO mice<br>-R1441G- <i>LRRK2</i> expressing mice              | <ul style="list-style-type: none"> <li>Modest impairments of motor behavior</li> </ul>                                                                                                     | [47]    |
|            | B6.Cg- <i>Park7<sup>tm1Shn</sup>/J</i>                                                                                                                                |   | X | - <i>Dj-1</i> KO mice<br>- <i>DJ-1</i> -deficient SH-SY5Y cells             | <ul style="list-style-type: none"> <li>Inhibited S-nitrosylation of endogenous Parkin</li> <li>Mitochondrial dysfunction</li> </ul>                                                        | [48]    |
|            | B6.Cg- <i>Park7<sup>tm1Shn</sup>/J</i><br>B6.129S4- <i>Park2<sup>tm1Shn</sup>/J</i>                                                                                   |   | X | - <i>Dj-1</i> KO mice<br>- <i>Prkn</i> KO mice                              | <ul style="list-style-type: none"> <li>Changes in the expression of neurotransmitter receptors</li> </ul>                                                                                  | [49]    |
|            | Mice resulting from crossing B6.129S4- <i>Prkn<sup>tm1Shn</sup>/J</i> line with B6.Cg- <i>Park7<sup>tm1Shn</sup>/J</i> line and <i>Sod1</i> KO or <i>Sod2</i> KO line | X | X | Triple <i>Prkn</i> KO + <i>Dj-1</i> KO + <i>Sod1</i> or <i>Sod2</i> KO mice | <ul style="list-style-type: none"> <li>Enhanced performance in locomotor tests</li> </ul>                                                                                                  | [50]    |
|            | n.s.n.                                                                                                                                                                | X | X | <i>DJ-1</i> $\beta$ mutants <i>Drosophila</i>                               | 36. Elevated levels of dopamine in the striatum                                                                                                                                            | [51]    |
| FBXO7      | n.s.n.                                                                                                                                                                | X | X | <i>Fbxo7</i> KO mice                                                        | <ul style="list-style-type: none"> <li>Reduced proteasome activity</li> <li>Motor deficits</li> <li>Premature death</li> </ul>                                                             | [52]    |

n.s.n.: Non standard nomenclature

## References in table S1:

1. Enquist, I. B.; Bianco, C. Lo; Ooka, A.; Nilsson, E.; Månsson, J. E.; Ehinger, M.; Richter, J.; Brady, R. O.; Kirik, D.; Karlsson, S. Murine models of acute neuronopathic Gaucher disease. *Proc. Natl. Acad. Sci. U. S. A.* **2007**, *104*, 17483–17488.
2. Eun, Y. K.; Young, B. H.; Sang, H. G.; Lee, B.; Jung, S. C. Downregulation of neurotrophic factors in the brain of a mouse model of Gaucher disease; implications for neuronal loss in Gaucher disease. *Exp. Mol. Med.* **2006**, *38*, 348–356.
3. Magalhaes, J.; Gegg, M. E.; Migdalska-Richards, A.; Doherty, M. K.; Whitfield, P. D.; Schapira, A. H. V. Autophagic lysosome reformation dysfunction in glucocerebrosidase deficient cells: Relevance to Parkinson disease. *Hum. Mol. Genet.* **2016**, *25*, 3432–3445.
4. Ikuno, M.; Yamakado, H.; Akiyama, H.; Parajuli, L. K.; Taguchi, K.; Hara, J.; Uemura, N.; Hatanaka, Y.; Higaki, K.; Ohno, K.; Tanaka, M.; Koike, M.; Hirabayashi, Y.; Takahashi, R. GBA haploinsufficiency accelerates  $\alpha$ -synuclein pathology with altered lipid metabolism in a prodromal model of Parkinson's disease. *Hum. Mol. Genet.* **2019**, *28*, 1894–1904.
5. Tayebi, N.; Parisiadou, L.; Berhe, B.; Gonzalez, A. N.; Serra-Vinardell, J.; Tamargo, R. J.; Maniawang, E.; Sorrentino, Z.; Fujiwara, H.; Grey, R. J.; Hassan, S.; Blech-Hermoni, Y. N.; Chen, C.; McGlinchey, R.; Makariou-Pikis, C.; Brooks, M.; Ginns, E. I.; Ory, D. S.; Giasson, B. I.; Sidransky, E. Glucocerebrosidase haploinsufficiency in A53T  $\alpha$ -synuclein mice impacts disease onset and course. *Mol. Genet. Metab.* **2017**, *122*, 198–208.
6. Migdalska-Richards, A.; Wegrzynowicz, M.; Rusconi, R.; Deangeli, G.; Di Monte, D. A.; Spillantini, M. G.; Schapira, A. H. V. The L444P Gba1 mutation enhances  $\alpha$ -synuclein induced loss of nigral dopaminergic neurons in mice. *Brain* **2017**, *140*, 2706–2721.
7. Chen, F.; Sugiura, Y.; Myers, K. G.; Liu, Y.; Lin, W. Ubiquitin carboxyl-terminal hydrolase L1 is required for maintaining the structure and function of the neuromuscular junction. *Proc. Natl. Acad. Sci. U. S. A.* **2010**, *107*, 1636–1641.
8. Shimshek, D. R.; Schweizer, T.; Schmid, P.; Van Der Putten, P. H. Excess  $\alpha$ -synuclein worsens disease in mice lacking ubiquitin carboxy-terminal hydrolase L1. *Sci. Rep.* **2012**, *2*.
9. Chen, X.; Kordich, J. K.; Williams, E. T.; Levine, N.; Cole-Strauss, A.; Marshall, L.; Labrie, V.; Ma, J.; Lipton, J. W.; Moore, D. J. Parkinson's disease-linked D620N VPS35 knockin mice manifest tau neuropathology and dopaminergic neurodegeneration. *Proc. Natl. Acad. Sci. U. S. A.* **2019**, *116*, 5765–5774.
10. Perez, F. A.; Curtis, W. R.; Palmiter, R. D. Parkin-deficient mice are not more sensitive to 6-hydroxydopamine or methamphetamine neurotoxicity. *BMC Neurosci.* **2005**, *6*, 1–10.
11. Perez, F. A.; Palmiter, R. D. Parkin-deficient mice are not a robust model of parkinsonism. *Proc. Natl. Acad. Sci. U. S. A.* **2005**, *102*, 2174–2179.
12. Dirr, E. R.; Ekhtor, O. R.; Blackwood, R.; Holden, J. G.; Masliah, E.; Schultheis, P. J.; Fleming, S. M. Exacerbation of sensorimotor dysfunction in mice deficient in Atp13a2 and overexpressing human wildtype  $\alpha$ -synuclein. *Behav. Brain Res.* **2018**, *343*, 41–49.
13. Zhang, L.; Zhong, S.; Li, Y.; Ji, G.; Sundaram, M.; Yao, Z. Global Inactivation of the Pla2g6 Gene in Mice Does Not Cause Dyslipidemia under Chow or High-fat Diet Conditions. **2013**, *18*.
14. Mori, A.; Hatano, T.; Inoshita, T.; Shiba-fukushima, K.; Koinuma, T.; Meng, H. regulates neuronal functions and  $\alpha$ -synuclein stability through membrane remodeling. **2019**, 1–11.
15. Lin, G.; Lee, P. T.; Chen, K.; Mao, D.; Tan, K. L.; Zuo, Z.; Lin, W. W.; Wang, L.; Bellen, H. J. Phospholipase PLA2G6, a Parkinsonism-Associated Gene, Affects Vps26 and Vps35, Retromer Function, and Ceramide Levels, Similar to  $\alpha$ -Synuclein Gain. *Cell Metab.* **2018**, *28*, 605-618.e6.
16. Chiu, C.; Lu, C.; Weng, Y.; Chen, Y.; Huang, Y. PARK14 ( D331Y ) PLA2G6 Causes Early-Onset Degeneration of Substantia Nigra Dopaminergic Neurons by Inducing Mitochondrial Dysfunction , ER Stress , Mitophagy Impairment and Transcriptional Dysregulation in a Knockin Mouse Model. **2018**, *14*.

17. Yim, Y.; Sun, T.; Wu, L.; Raimondi, A.; Camilli, P. De; Eisenberg, E.; Greene, L. E. Endocytosis and clathrin-uncoating defects at synapses of auxilin knockout mice. **2010**, *107*, 1–6.
18. Roosen, D. A.; Landeck, N.; Conti, M.; Smith, N.; Saez-atienzar, S. Mutations in Auxilin cause parkinsonism via impaired clathrin-mediated trafficking at the Golgi apparatus and synapse. **2019**, 1–39.
19. Song, L.; He, Y.; Ou, J.; Cheng, J.; Lin, C.; Ho, M. S.; Song, L.; He, Y.; Ou, J.; Zhao, Y.; Li, R.; Cheng, J.; Lin, C. Auxilin Underlies Progressive Locomotor Deficits and Dopaminergic Neuron Loss in a Drosophila Model of Parkinson ' s Disease Article Auxilin Underlies Progressive Locomotor Deficits and Dopaminergic Neuron Loss in a Drosophila Model of Parkinson ' s Disea. *CellReports* **2017**, *18*, 1132–1143.
20. Watanabe, S.; Mamer, L. E.; Raychaudhuri, S.; Luvsanjav, D.; Eisen, J.; Trimbuch, T.; Söhl-Kielczynski, B.; Fenske, P.; Milosevic, I.; Rosenmund, C.; Jorgensen, E. M. Synaptojanin and Endophilin Mediate Neck Formation during Ultrafast Endocytosis. *Neuron* **2018**, *98*, 1184–1197.e6.
21. Mani, M.; Lee, S. Y.; Lucast, L.; Cremona, O.; Di Paolo, G.; De Camilli, P.; Ryan, T. A. The Dual Phosphatase Activity of Synaptojanin1 Is Required for Both Efficient Synaptic Vesicle Endocytosis and Reavailability at Nerve Terminals. *Neuron* **2007**, *56*, 1004–1018.
22. Cremona, O.; Paolo, G. Di; Wenk, M. R.; Lu, A.; Kim, W. T.; Takei, K.; Daniell, L.; Nemoto, Y.; Shears, S. B.; Flavell, R. A.; McCormick, D. A.; Camilli, P. De; Haven, N.; Mediche, S.; Carolina, N. Essential Role of Phosphoinositide Metabolism in Synaptic Vesicle Recycling. **1999**, *99*, 179–188.
23. Gong, L.; Camilli, P. De Regulation of postsynaptic AMPA responses by synaptojanin 1. **2008**, *105*.
24. McIntire, L. B. J.; Berman, D. E.; Myaeng, J.; Staniszewski, A.; Arancio, O.; Paolo, G. Di; Kim, T. Reduction of Synaptojanin 1 Ameliorates Synaptic and Behavioral Impairments in a Mouse Model of Alzheimer ' s Disease. **2012**, *32*, 15271–15276.
25. Pan, X. P.; Li, X. X.; Wang, J.; Powell, X. J.; Wang, Q.; Zhang, X. Y.; Chen, Z.; Wicinski, B.; Hof, P.; Ryan, X. T. A.; Yue, Z. Parkinson ' s Disease-Associated LRRK2 Hyperactive Kinase Mutant Disrupts Synaptic Vesicle Trafficking in Ventral Midbrain Neurons. **2017**, *37*, 11366–11376.
26. Cossec, J.; Mircher, C.; Grattau, Y.; Hoischen, A.; Stora, S.; Olivomarin, J.; Chaumont, F. De; Lecourtois, M.; Antonarakis, S. E.; Veltman, J. A.; Delabar, J. M.; Duyckaerts, C.; Paolo, G. Di; Potier, M. Trisomy for Synaptojanin1 in Down syndrome is functionally linked to the enlargement of early endosomes. **2012**, *21*, 3156–3172.
27. Voronov, S. V.; Frere, S. G.; Giovedi, S.; Pollina, E. A.; Borel, C.; Zhang, H.; Schmidt, C.; Akeson, E. C.; Wenk, M. R.; Cimasoni, L.; Arancio, O.; Davisson, M. T.; Antonarakis, S. E.; Gardiner, K.; De Camilli, P.; Di Paolo, G. Synaptojanin 1-linked phosphoinositide dyshomeostasis and cognitive deficits in mouse models of Down's syndrome. *Proc. Natl. Acad. Sci. U. S. A.* **2008**, *105*, 9415–9420.
28. Cao, M.; Wu, Y.; Ashrafi, G.; McCartney, A. J.; Wheeler, H.; Bushong, E. A.; Boassa, D.; Ellisman, M. H.; Ryan, T. A.; De Camilli, P. Parkinson Sac Domain Mutation in Synaptojanin 1 Impairs Clathrin Uncoating at Synapses and Triggers Dystrophic Changes in Dopaminergic Axons. *Neuron* **2017**, *93*, 882–896.e5.
29. Zhou, W.; Barkow, J. C.; Freed, C. R. Running wheel exercise reduces  $\alpha$ -synuclein aggregation and improves motor and cognitive function in a transgenic mouse model of Parkinson ' s disease. **2017**, 1–18.
30. Irrcher, I.; Aleyasin, H.; Seifert, E. L.; Hewitt, S. J.; Chhabra, S.; Phillips, M.; Lutz, A. K.; Rousseaux, M. W. C.; Bevilacqua, L.; Callaghan, S.; Maclaurin, J. G.; Winklhofer, K. F.; Rizzu, P.; Rippstein, P.; Kim, R. H.; Chen, C. X.; Fon, E. A.; Slack, R. S.; Harper, M. E.; McBride, H. M.; Mak, T. W.; Park, D. S. Loss of the Parkinson ' s disease-linked gene DJ-1 perturbs mitochondrial dynamics. **2010**, *19*, 3734–3746.
31. Aleyasin, H.; Rousseaux, M. W. C.; Phillips, M.; Kim, R. H.; Bland, R. J.; Callaghan, S.; Slack, R. S.; During, M. J.; Mak, T. W.; Park, D. S. The Parkinson ' s disease gene DJ-1 is also a key regulator of stroke-induced damage. **2007**.

32. Aleyasin, H.; Rousseaux, M. W. C.; Marcogliese, P. C.; Hewitt, S. J.; Irrcher, I.; Joselin, A. P. DJ-1 protects the nigrostriatal axis from the neurotoxin MPTP by modulation of the AKT pathway. **2009**.
33. Xu, S.; Yang, X.; Qian, Y.; Xiao, Q. Parkinson's disease-related DJ-1 modulates the expression of uncoupling protein 4 against oxidative stress. *J. Neurochem.* **2018**, *145*, 312–322.
34. Shi, H.; Deng, H.; Gius, D.; Schumacker, P. T.; Surmeier, D. J.; Ma, Y. Sirt3 protects dopaminergic neurons from mitochondrial oxidative stress. **2017**, *26*, 1915–1926.
35. Tai-Nagara, I.; Matsuoka, S.; Ariga, H.; Suda, T. Mortalin and DJ-1 coordinately regulate hematopoietic stem cell function through the control of oxidative stress. *Blood* **2014**, *123*, 41–50.
36. Lopert, P.; Patel, M. Redox Biology Brain mitochondria from DJ-1 knockout mice show increased respiration-dependent hydrogen peroxide consumption. *Elsevier* **2014**, *2*, 667–672.
37. Sheng, C.; Heng, X.; Zhang, G.; Xiong, R.; Li, H.; Zhang, S. DJ-1 deficiency perturbs microtubule dynamics and impairs striatal neurite outgrowth. **2013**, *34*, 489–498.
38. Giaime, E.; Yamaguchi, H.; Gautier, C. A.; Kitada, T.; Shen, J. Loss of DJ-1 Does Not Affect Mitochondrial Respiration but Increases ROS Production and Mitochondrial Permeability Transition Pore Opening. **2012**, *7*.
39. Shtifman, A.; Zhong, N.; Lopez, J. R.; Shen, J.; Xu, J. Altered Ca<sup>2+</sup> homeostasis in the skeletal muscle of DJ-1 null mice. *Neurobiol. Aging* **2011**, *32*, 125–132.
40. Yamaguchi, H.; Shen, J. Absence of dopaminergic neuronal degeneration and oxidative damage in aged DJ-1-deficient mice. *Mol. Neurodegener.* **2007**, *2*, 10.
41. Burch, J.; McKenna, C.; Palmer, S.; Norman, G.; Glanville, J.; Sculpher, M.; Woolacott, N. Rimonabant for the treatment of overweight and obese people. *Health Technol. Assess.* **2009**, *13 Suppl 3*, 13–22.
42. Goldberg, M. S.; Pisani, A.; Haburcak, M.; Vortherms, T. A.; Kitada, T.; Costa, C.; Tong, Y.; Martella, G.; Tschertter, A.; Martins, A.; Bernardi, G.; Roth, B. L.; Pothos, E. N.; Calabresi, P.; Shen, J. Nigrostriatal dopaminergic deficits and hypokinesia caused by inactivation of the familial parkinsonism-linked gene DJ-1. *Neuron* **2005**, *45*, 489–496.
43. Pisani, A.; Martella, G.; Tschertter, A.; Costa, C.; Mercuri, N. B.; Bernardi, G.; Shen, J.; Calabresi, P. Enhanced sensitivity of DJ-1-deficient dopaminergic neurons to energy metabolism impairment: Role of Na<sup>+</sup>/K<sup>+</sup> ATPase. **2006**, *23*, 54–60.
44. Bonilha, V. L.; Bell, B. A.; Rayborn, M. E.; Yang, X.; Kaul, C.; Grossman, G. H.; Samuels, I. S.; Hollyfield, J. G.; Xie, C.; Cai, H.; Shadrach, K. G. Loss of DJ-1 elicits retinal abnormalities, visual dysfunction, and increased oxidative stress in mice. *Exp. Eye Res.* **2015**, *139*, 22–36.
45. Chandran, J. S.; Lin, X.; Zapata, A.; Höke, A.; Shimoji, M.; Moore, S. O.; Galloway, M. P.; Laird, F. M.; Wong, P. C.; Price, D. L.; Bailey, K. R.; Crawley, J. N.; Shippenberg, T.; Cai, H. Progressive behavioral deficits in DJ-1-deficient mice are associated with normal nigrostriatal function. *Neurobiol. Dis.* **2008**, *29*, 505–514.
46. Aron, L.; Klein, P.; Pham, T.; Kramer, E. R.; Wurst, W. Pro-Survival Role for Parkinson's Associated Gene DJ-1 Revealed in Trophically Impaired Dopaminergic Neurons. **2010**, *8*.
47. Marcogliese, P. C.; Park, D. S.; Sanchez, G.; Varaschin, R. K.; Bu, H. Unaltered Striatal Dopamine Release Levels in Young Parkin Knockout, Pink1 Knockout, DJ-1 Knockout and LRRK2 R1441G Transgenic Mice. **2014**, *9*.
48. Oz, K.; Hiroki, T.; Yuri, M.; Ya, J. DJ-1 is indispensable for the S-nitrosylation of Parkin, which maintains function of mitochondria. **2020**, 1–11.
49. Cremer, J. N.; Amunts, K.; Schleicher, A.; Palomero-Gallagher, N.; Piel, M.; Rösch, F.; Zilles, K. Changes in the expression of neurotransmitter receptors in Parkin and DJ-1 knockout mice - A quantitative multireceptor study. *Neuroscience* **2015**, *311*, 539–551.
50. Hennis, M. R.; Seamans, K. W.; Marvin, M. A.; Casey, B. H.; Matthew, S. Behavioral and Neurotransmitter Abnormalities in Mice Deficient for Parkin, DJ-1 and Superoxide Dismutase. **2013**, *8*, 1–17.
51. Park, J.; Kim, S. Y.; Cha, G.; Lee, S. B.; Kim, S.; Chung, J. Drosophila DJ-1 mutants show



oxidative stress-sensitive locomotive dysfunction. **2005**, *361*, 133–139.

52. Vingill, S.; Brockelt, D.; Lancelin, C.; Tatenhorst, L.; Dontcheva, G.; Preisinger, C.; Schwedhelm-domeyer, N.; Joseph, S.; Mitkovski, M.; Nave, K.; Schulz, J. B.; Marquardt, T.; Lingor, P.; Stegmüller, J. Loss of FBXO 7 ( PARK 15 ) results in reduced proteasome activity and models a parkinsonism-like phenotype in mice. **2016**, *35*, 2008–2025.
